# Supplementary material for: A Dynamic Combinatorial Approach for Identifying Side Groups that Stabilize DNA-Templated Supramolecular Self-Assemblies
Source: MDPI journal article supplement (doi:10.3390/ijms16023609), 2015-02-06
Supplement: s1 [file s1]

# Supplementary Information



(A)



(B)



(C)



(A')



(B')

Figure S1. Cont.



(C')

**Figure S1.** LC-MS chromatograms of the supernatants and washes of the experiments ( $n = 2$ ) with benzylamine in presence of oligo(dT) on cellulose in MilliQ water compared to the control library in solution. **A/A'**: wash of the oligo(dT) on cellulose; **B/B'**: supernatant of the library in presence of oligo(dT) on cellulose; **C/C'**: control library in solution. Method I (A/B/C) or II (A'/B'/C'), monitored at 214 nm. Products:  $\blacklozenge$  Gua(OH)<sub>2</sub>;  $\bullet$  Gua-Benz;  $\star$  Gua-Benz<sub>2</sub>.



**Figure S2.** *Cont.*



(A-2)



(B-2)



(C-2)



(A-3)



(B-3)



(C-3)

Figure S2. Cont.



**Figure S2.** LC-MS chromatograms of the supernatants and washes of the experiments ( $n = 5$ ) with benzylamine in presence of cellulose in MilliQ water compared to the control library in solution. **A/A'**: wash of the cellulose; **B/B'**: supernatant of the library in presence of cellulose; **C/C'**: control library in solution. Method I (**A-1–A-4/B-1–B-4/C-1–C-4**) or II (**A'/B'/C'**), monitored at 214 nm. Products: ♦ Gua(OH)<sub>2</sub>; ● Gua-Benz and ★ Gua-Benz<sub>2</sub>.



**Figure S3.** Extracted mass spectrum of the peak at 8.25 min in method I, corresponding to the product Gua(OH)<sub>2</sub>. Calcd for C<sub>17</sub>H<sub>22</sub>N<sub>3</sub>O<sub>2</sub><sup>+</sup> ([M]<sup>+</sup>): 300.17, found: 300.56.



**Figure S4.** Extracted mass spectrum of the peak at 17.01 min in method I, corresponding to the product Gua-Benz. Calcd for C<sub>24</sub>H<sub>29</sub>N<sub>4</sub>O<sup>+</sup> ([M]<sup>+</sup>): 389.23, found: 389.70.



**Figure S5.** Extracted mass spectrum of the peak at 25.38 min in method I, corresponding to the product Gua-Benz<sub>2</sub>. Calcd for C<sub>31</sub>H<sub>36</sub>N<sub>5</sub><sup>+</sup> ([M]<sup>+</sup>): 478.30, found: 478.77.



**Figure S6.** Extracted mass spectrum of the peak at 6.14 min in method II, corresponding to the product Gua(OH)<sub>2</sub>. Calcd for C<sub>17</sub>H<sub>22</sub>N<sub>3</sub>O<sub>2</sub><sup>+</sup> ([M]<sup>+</sup>): 300.17, found: 300.15.



**Figure S7.** Extracted mass spectrum of the peak at 13.19 min in method II, corresponding to the product Gua-Benz. Calcd for C<sub>24</sub>H<sub>29</sub>N<sub>4</sub>O<sup>+</sup> ([M]<sup>+</sup>): 389.23, found: 389.15.



**Figure S8.** Extracted mass spectrum of the peak at 21.58 min in method II, corresponding to the product Gua-Benz<sub>2</sub>. Calcd for C<sub>31</sub>H<sub>36</sub>N<sub>5</sub><sup>+</sup> ([M]<sup>+</sup>): 478.30, found: 478.29.



**Figure S9.** LC-MS chromatograms of the supernatants and washes of the experiment with benzylamine in presence of oligo(dT) on cellulose in phosphate buffer (100 mM, pH 6.0) compared to the control library in solution. **A:** wash of the oligo(dT) on cellulose; **B:** supernatant of the library in presence of oligo(dT) on cellulose; **C:** control library in solution. Method I, monitored at 214 nm. Products: ◆ Gua(OH)<sub>2</sub>; ● Gua-Benz and ★ Gua-Benz<sub>2</sub>.



Figure S10. Cont.



**Figure S10.** LC-MS chromatograms of the supernatants and washes of the experiments ( $n = 4$ ) with benzylamine in presence of cellulose in phosphate buffer (100 mM, pH 6.0) compared to the control library in solution. **A-1–A-4:** wash of the cellulose; **B-1–B-4:** supernatant of the library in presence of cellulose; **C-1–C-4:** control library in solution. Method I, monitored at 214 nm. Products:  $\blacklozenge$  Gua(OH)<sub>2</sub>;  $\bullet$  Gua-Benz and  $\star$  Gua-Benz<sub>2</sub>.



**Figure S11.** MALDI-TOF mass spectrum of a mixture of dT<sub>10</sub>:Gua-Benz<sub>2</sub> (molar ratio 1:10).



**Figure S12.** MALDI-TOF mass spectrum of a mixture of dT<sub>10</sub>:Gua(OH)<sub>2</sub> (molar ratio 1:10).



**Figure S13.** MALDI-TOF mass spectrum of a mixture of dT<sub>10</sub>:Gua-Agm<sub>2</sub> (molar ratio 1:10).



**Figure S14.** LC-MS chromatograms of the supernatants and washes of the experiments with L-phenylalanine in presence of oligo(dT) on cellulose in MilliQ water compared to the control library in solution. **A:** wash of the oligo(dT) on cellulose; **B:** supernatant of the library in presence of oligo(dT) on cellulose; **C:** control library in solution. Method II, monitored at 214 nm. Products:  $\blacklozenge$  Gua(OH)<sub>2</sub>;  $\bullet$  Gua-Phe and  $\star$  Gua-Phe<sub>2</sub>.



**Figure S15.** LC-MS chromatograms of the supernatants and washes of the experiments with L-phenylalanine in presence of cellulose in MilliQ water compared to the control library in solution. **A:** wash of the cellulose; **B:** supernatant of the library in presence of cellulose; **C:** control library in solution. Method II, monitored at 214 nm. Products:  $\blacklozenge$  Gua(OH)<sub>2</sub>;  $\bullet$  Gua-Phe and  $\star$  Gua-Phe<sub>2</sub>.



**Figure S16.** Extracted mass spectrum of the peak at 12.02 min in method II, corresponding to the product Gua-Phe. Calcd for  $C_{26}H_{31}N_4O_3^+$  ( $[M]^+$ ): 447.24, found: 447.15.



**Figure S17.** Extracted mass spectrum of the peak at 19.15 min in method II, corresponding to the product Gua-Phe<sub>2</sub>. Calcd for C<sub>35</sub>H<sub>40</sub>N<sub>5</sub>O<sub>4</sub><sup>+</sup> ([M]<sup>+</sup>): 594.31, found: 594.20.



**Figure S18.** LC-MS chromatograms of the supernatants and washes of the experiments with L-leucine (Leu) in presence of oligo(dT) on cellulose in MilliQ water compared to the control library in solution. **A:** wash of the oligo(dT) on cellulose; **B:** supernatant of the library in presence of oligo(dT) on cellulose; **C:** control library in solution. Method II, monitored at 214 nm. Products:  $\blacklozenge$  Gua(OH)<sub>2</sub>;  $\bullet$  Gua-Leu and  $\star$  Gua-Leu<sub>2</sub>.



**Figure S19.** LC-MS chromatograms of the supernatants and washes of the experiments with L-leucine (Leu) in presence of cellulose in MilliQ water compared to the control library in solution. **A:** wash of the cellulose; **B:** supernatant of the library in presence of cellulose; **C:** control library in solution. Method II, monitored at 214 nm. Products:  $\blacklozenge$  Gua(OH)<sub>2</sub>;  $\bullet$  Gua-Leu and  $\star$  Gua-Leu<sub>2</sub>.



**Figure S20.** Extracted mass spectrum of the peak at 9.66 min in method II, corresponding to the product Gua-Leu. Calcd for C<sub>23</sub>H<sub>33</sub>N<sub>4</sub>O<sub>3</sub><sup>+</sup> ([M]<sup>+</sup>): 413.25, found: 413.25.



**Figure S21.** Extracted mass spectrum of the peak at 14.36 min in method II, corresponding to the product Gua-Leu<sub>2</sub>. Calcd for C<sub>29</sub>H<sub>44</sub>N<sub>5</sub>O<sub>4</sub><sup>+</sup> ([M]<sup>+</sup>): 526.34, found: 526.15.



**Figure S22.** LC-MS chromatograms of the supernatants and washes of the experiments with L-Arginine (Arg) in presence of oligo(dT) on cellulose in MilliQ water compared to the control library in solution. **A**: wash of the oligo(dT) on cellulose; **B**: supernatant of the library in presence of oligo(dT) on cellulose; **C**: control library in solution. Method II, monitored at 214 nm. Products:  $\blacklozenge$  Gua(OH)<sub>2</sub>;  $\bullet$  Gua-Arg and  $\star$  Gua-Arg<sub>2</sub>.



**Figure S23.** LC-MS chromatograms of the supernatants and washes of the experiments with L-Arginine (Arg) in presence of cellulose in MilliQ water compared to the control library in solution. **A:** wash of the cellulose; **B:** supernatant of the library in presence of cellulose; **C:** control library in solution. Method II, monitored at 214 nm. Products:  $\blacklozenge$  Gua(OH)<sub>2</sub>;  $\bullet$  Gua-Arg and  $\star$  Gua-Arg<sub>2</sub>.



**Figure S24.** Extracted mass spectrum of the peak at 1.35 min in method II, corresponding to the product Gua-Arg<sub>2</sub>. Calcd for C<sub>27</sub>H<sub>48</sub>N<sub>11</sub><sup>2+</sup> ([M-H]<sup>2+</sup>): 306.69, found: 306.75.



**Figure S25.** Extracted mass spectrum of the peak at 2.66 min in method II, corresponding to the product Gua-Arg. Calcd for  $C_{23}H_{34}N_7O_3^+$  ( $[M-H]^+$ ): 456.27, found: 456.10.



**Figure S26.** LC-MS chromatograms of the supernatants and washes of the experiments with L-histidine (His) in presence of oligo(dT) on cellulose in MilliQ water compared to the control library in solution. **A**: wash of the oligo(dT) on cellulose; **B**: supernatant of the library in presence of oligo(dT) on cellulose; **C**: control library in solution. Method II, monitored at 214 nm. Products:  $\blacklozenge$  Gua(OH)<sub>2</sub>;  $\bullet$  Gua-His and  $\star$  Gua-His<sub>2</sub>.



**Figure S27.** LC-MS chromatograms of the supernatants and washes of the experiments with L-histidine (His) in presence of cellulose in MilliQ water compared to the control library in solution. **A:** wash of the cellulose; **B:** supernatant of the library in presence of cellulose; **C:** control library in solution. Method II, monitored at 214 nm. Products:  $\blacklozenge$  Gua(OH)<sub>2</sub>;  $\bullet$  Gua-His and  $\star$  Gua-His<sub>2</sub>.



**Figure S28.** Extracted mass spectrum of the peak at 2.22 min in method II, corresponding to the product Gua-His. Calcd for C<sub>23</sub>H<sub>29</sub>N<sub>6</sub>O<sub>3</sub><sup>+</sup> ([M]<sup>+</sup>): 437.23, found: 437.55.



**Figure S29.** Extracted mass spectrum of the peak at 0.83 min in method II, corresponding to the product Gua-His<sub>2</sub>. Calcd for C<sub>29</sub>H<sub>36</sub>N<sub>9</sub>O<sub>4</sub><sup>+</sup> ([M]<sup>+</sup>): 574.29, found: 574.15.



**Figure S30.** LC-MS chromatograms of the supernatants and washes of the experiments with L-cysteic acid (Cyst) in presence of oligo(dT) on cellulose in MilliQ water compared to the control library in solution. **A**: wash of the oligo(dT) on cellulose; **B**: supernatant of the library in presence of oligo(dT) on cellulose; **C**: control library in solution. Method II, monitored at 214 nm. Products: ♦ Gua(OH)<sub>2</sub>; ● Gua-Cyst and ★ Gua-Cyst<sub>2</sub>.



**Figure S31.** LC-MS chromatograms of the supernatants and washes of the experiments with L-cysteic acid (Cyst) in presence of cellulose in MilliQ water compared to the control library in solution. **A:** wash of the cellulose; **B:** supernatant of the library in presence of cellulose; **C:** control library in solution. Method II, monitored at 214 nm. Products:  $\blacklozenge$  Gua(OH)<sub>2</sub>;  $\bullet$  Gua-Cyst and  $\star$  Gua-Cyst<sub>2</sub>.



**Figure S32.** Extracted mass spectrum of the peak at 1.68 min in method II, corresponding to the product Gua-Cyst. Calcd for C<sub>20</sub>H<sub>27</sub>N<sub>4</sub>O<sub>6</sub>S<sup>+</sup> ([M]<sup>+</sup>): 451.16, found: 451.05.



**Figure S33.** Extracted mass spectrum of the peak at 0.91 min in method II, corresponding to the product Gua-Cyst<sub>2</sub>. Calcd for C<sub>23</sub>H<sub>32</sub>N<sub>5</sub>O<sub>10</sub>S<sub>2</sub><sup>+</sup> ([M]<sup>+</sup>): 602.16, found: 602.45.



**Figure S34.** LC-MS chromatograms of the supernatants and washes of the experiments with Phe(OtBu) in presence of oligo(dT) on cellulose in MilliQ water compared to the control library in solution. **A:** wash of the oligo(dT) on cellulose; **B:** supernatant of the library in presence of oligo(dT) on cellulose; **C:** control library in solution. Method II, monitored at 214 nm. Products:  $\blacklozenge$  Gua(OH)<sub>2</sub>;  $\blacksquare$  Gua-Phe;  $\bullet$  Gua-Phe(OtBu) and  $\star$  Gua-(Phe)(PheOtBu).



**Figure S35.** LC-MS chromatograms of the supernatants and washes of the experiments with Phe(OtBu) in presence of cellulose in MilliQ water compared to the control library in solution. **A:** wash of the cellulose; **B:** supernatant of the library in presence of cellulose; **C:** control library in solution. Method II, monitored at 214 nm. Products:  $\blacklozenge$  Gua(OH)<sub>2</sub>;  $\blacksquare$  Gua-Phe;  $\bullet$  Gua-PheOtBu and  $\star$  Gua-(Phe)(PheOtBu).



**Figure S36.** Extracted mass spectrum of the peak at 30.68 min in method II, corresponding to the product Gua-PheOtBu. Calcd for  $C_{30}H_{39}N_4O_3^+$  ( $[M]^+$ ): 503.30, found: 503.20.



**Figure S37.** Extracted mass spectrum of the peak at 34.79 min in method II, corresponding to the product Gua-(Phe)(PheOtBu). Calcd for  $C_{39}H_{48}N_5O_4^+$  ( $[M]^+$ ): 650.37, found: 650.20.



**Figure S38.** LC-MS chromatograms of the supernatants and washes of the experiments with agmatine (Agm) in presence of oligo(dT) on cellulose in MilliQ water compared to the control library in solution. **A:** wash of the oligo(dT) on cellulose; **B:** supernatant of the library in presence of oligo(dT) on cellulose; **C:** control library in solution. Method II, monitored at 214 nm. Products:  $\blacklozenge$  Gua(OH)<sub>2</sub>;  $\bullet$  Gua-Agm and  $\star$  Gua-Agm<sub>2</sub>.



**Figure S39.** LC-MS chromatograms of the supernatants and washes of the experiments with agmatine (Agm) in presence of cellulose in MilliQ water compared to the control library in solution. **A:** wash of the cellulose; **B:** supernatant of the library in presence of cellulose; **C:** control library in solution. Method II, monitored at 214 nm. Products:  $\blacklozenge$  Gua(OH)<sub>2</sub>;  $\bullet$  Gua-Agm and  $\star$  Gua-Agm<sub>2</sub>.



**Figure S40.** Extracted mass spectrum of the peak at 2.12 min in method II, corresponding to the product Gua-Agm<sub>2</sub>. Calcd for C<sub>27</sub>H<sub>46</sub>N<sub>11</sub><sup>+</sup> ([M - 2H]<sup>+</sup>): 524.39, found: 524.25.



**Figure S41.** Extracted mass spectrum of the peak at 4.57 min in method II, corresponding to the product Gua-Agm. Calcd for  $C_{22}H_{34}N_7O^+$  ( $[M - H]^+$ ): 412.28, found: 412.15.



**Figure S42.** LC-MS chromatograms of the supernatants and washes of the experiments with Arg(OMe) in presence of oligo(dT) on cellulose in MilliQ water compared to the control library in solution. **A:** wash of the oligo(dT) on cellulose; **B:** supernatant of the library in presence of oligo(dT) on cellulose; **C:** control library in solution. Method II, monitored at 214 nm. Products:  $\blacktriangle$  Gua-Arg<sub>2</sub>;  $\blacksquare$  Gua-Arg;  $\blacklozenge$  Gua(OH)<sub>2</sub>;  $\bullet$  Gua-ArgOMe and  $\star$  Gua-ArgOMe<sub>2</sub>.



**Figure S43.** LC-MS chromatograms of the supernatants and washes of the experiments with Arg(OMe) in presence of cellulose in MilliQ water compared to the control library in solution. **A:** wash of the cellulose; **B:** supernatant of the library in presence of cellulose; **C:** control library in solution. Method II, monitored at 214 nm. Products:  $\blacktriangle$  Gua-Arg;  $\blacksquare$  Gua-Arg;  $\blacklozenge$  Gua(OH)<sub>2</sub>;  $\bullet$  Gua-ArgOMe and  $\star$  Gua-ArgOMe<sub>2</sub>.



**Figure S44.** Extracted mass spectrum of the peak at 6.02 min in method II, corresponding to the product Gua-ArgOMe. Calcd for C<sub>24</sub>H<sub>36</sub>N<sub>7</sub>O<sub>3</sub><sup>+</sup> ([M - H]<sup>+</sup>): 470.29, found: 470.15.





**Figure S47.** LC-MS chromatograms of the supernatants and washes of the competition experiments with L-leucine (Leu) and L-arginine (Arg) in presence of cellulose in MilliQ water compared to the control library in solution. **A:** wash of the cellulose; **B:** supernatant of the library in presence of cellulose; **C:** control library in solution. Method II, monitored at 214 nm. Products:  $\blacktriangle$  Gua-Arg<sub>2</sub>;  $\blacksquare$  Gua-Arg;  $\blacklozenge$  Gua(OH)<sub>2</sub>;  $\blacklozenge$  Gua-(Leu)(Arg);  $\bullet$  Gua-Leu and  $\star$  Gua-Leu<sub>2</sub>.



**Figure S48.** Extracted mass spectrum of the peak at 6.30 min in method II, corresponding to the product Gua-(Arg)(Leu). Calcd for  $C_{29}H_{46}N_8O_4^{2+}$  ( $[M]^{2+}$ ): 285.18, found: 285.30.



**Figure S49.** LC-MS chromatograms of the supernatants and washes of the competition experiments with benzylamine (Benz) and taurine (Taur) in presence of oligo(dT) on cellulose in MilliQ water compared to the control library in solution. **A:** wash of the oligo(dT) on cellulose; **B:** supernatant of the library in presence of oligo(dT) on cellulose; **C:** control library in solution. Method II, monitored at 214 nm. Products:  $\blacktriangle$  Gua-Taur<sub>2</sub>;  $\blacksquare$  Gua-Taur;  $\blacklozenge$  Gua(OH)<sub>2</sub>;  $\blacklozenge$  Gua-(Taur)(Benz);  $\bullet$  Gua-Benz and  $\star$  Gua-Benz<sub>2</sub>.



**Figure S50.** LC-MS chromatograms of the supernatants and washes of the competition experiments with benzylamine (Benz) and taurine (Taur) in presence of cellulose in MilliQ water compared to the control library in solution. **A:** wash of the cellulose; **B:** supernatant of the library in presence of cellulose; **C:** control library in solution. Method II, monitored at 214 nm. Products:  $\blacktriangle$  Gua-Taur<sub>2</sub>;  $\blacksquare$  Gua-Taur;  $\blacklozenge$  Gua(OH)<sub>2</sub>;  $\blacklozenge$  Gua-(Taur)(Benz);  $\bullet$  Gua-Benz and  $\star$  Gua-Benz<sub>2</sub>.



**Figure S51.** Extracted mass spectrum of the peak at 0.75 min in method II, corresponding to the product Gua-Taur<sub>2</sub>. Calcd for C<sub>21</sub>H<sub>32</sub>N<sub>5</sub>O<sub>6</sub>S<sub>2</sub><sup>+</sup> ([M]<sup>+</sup>): 514.18, found: 514.00.



**Figure S52.** Extracted mass spectrum of the peak at 1.93 min in method II, corresponding to the product Gua-Taur. Calcd for  $C_{19}H_{27}N_4O_4S^+$  ( $[M]^+$ ): 407.17, found: 407.05.



**Figure S53.** LC-MS chromatograms of the supernatants and washes of the competition experiments with L-phenylalanine (Phe) and L-arginine (Arg) in presence of oligo(dT) on cellulose in MilliQ water compared to the control library in solution. **A:** wash of the oligo(dT) on cellulose; **B:** supernatant of the library in presence of oligo(dT) on cellulose; **C:** control library in solution. Method II, monitored at 214 nm. Products:  $\blacktriangle$  Gua-Arg<sub>2</sub>;  $\blacksquare$  Gua-Arg;  $\blacklozenge$  Gua(OH)<sub>2</sub>;  $\blacklozenge$  Gua-(Phe)(Arg);  $\bullet$  Gua-Phe and  $\star$  Gua-Phe<sub>2</sub>.



**Figure S54.** LC-MS chromatograms of the supernatants and washes of the competition experiments with L-phenylalanine (Phe) and L-arginine (Arg) in presence of cellulose in MilliQ water compared to the control library in solution. **A:** wash of the cellulose; **B:** supernatant of the library in presence of cellulose; **C:** control. Method II, monitored at 214 nm. Products:  $\blacktriangle$  Gua-Arg<sub>2</sub>;  $\blacksquare$  Gua-Arg;  $\blacklozenge$  Gua(OH)<sub>2</sub>;  $\blacklozenge$  Gua-(Phe)(Arg);  $\bullet$  Gua-Phe and  $\star$  Gua-Phe<sub>2</sub>.



**Figure S55.** Extracted mass spectrum of the peak at 8.37 min in method II, corresponding to the product Gua-(Phe)(Arg). Calcd for C<sub>32</sub>H<sub>43</sub>N<sub>8</sub>O<sub>4</sub><sup>+</sup> ([M]<sup>+</sup>): 603.34, found: 603.30.
